# Supplementary material for: Processing Hundreds of SARS-CoV-2 Samples with an In-House PCR-Based Method without Robotics
Source: MDPI journal article supplement (doi:10.3390/v13091712), 2021-08-28
Supplement: s1 [file s1]

## Supplementary Materials

**Table S1.** Validated samples for the JKU in-house system.

| No. | Sample-ID  | Buffer | COBAS System |          | JKU System |         |          |
|-----|------------|--------|--------------|----------|------------|---------|----------|
|     |            |        | Cq           | Result   | Cq (N1)    | Cq (N2) | Result   |
| 1   | 62505168   | COBAS  | 16.80        | positive | 11.11      | 10.84   | positive |
| 2   | 62511498   | NaCl   | 17.40        | positive | 19.67      | 20.64   | positive |
| 3   | 62515602   | NaCl   | 18.42        | positive | 21.46      | 21.52   | positive |
| 4   | 6250958827 | NaCl   | 19.07        | positive | 21.54      | 21.21   | positive |
| 5   | 62505173   | COBAS  | 20.14        | positive | 16.91      | 17.29   | positive |
| 6   | 62505066   | COBAS  | 20.16        | positive | 17.36      | 17.84   | positive |
| 7   | 62505453   | COBAS  | 20.49        | positive | 19.7       | 20.03   | positive |
| 8   | 62505183   | COBAS  | 20.66        | positive | 16.12      | 16.62   | positive |
| 9   | 62521008   | NaCl   | 21.00        | positive | 22.53      | 22.5    | positive |
| 10  | 6250943827 | NaCl   | 21.03        | positive | 21.43      | 21.63   | positive |
| 11  | 62505679   | COBAS  | 21.85        | positive | 20.97      | 21.61   | positive |
| 12  | 62506522   | COBAS  | 22.70        | positive | 16.18      | 16.96   | positive |
| 13  | 62517237   | NaCl   | 23.00        | positive | 27.19      | 26.95   | positive |
| 14  | 62513328   | COBAS  | 23.43        | positive | 20.88      | 21.4    | positive |
| 15  | 62517464   | COBAS  | 23.59        | positive | 21.94      | 22.73   | positive |
| 16  | 62505456   | COBAS  | 23.66        | positive | 18.69      | 23.28   | positive |
| 17  | 62505255   | COBAS  | 23.76        | positive | 21.61      | 22.32   | positive |
| 18  | 62505202   | COBAS  | 23.83        | positive | 20.8       | 21.15   | positive |
| 19  | 62504987   | COBAS  | 23.85        | positive | 21.97      | 22.64   | positive |
| 20  | 62511482   | NaCl   | 24.00        | positive | 25.9       | 27.32   | positive |
| 21  | 62504863   | COBAS  | 24.44        | positive | 21.05      | 21.73   | positive |
| 22  | 62524349   | COBAS  | 24.63        | positive | 26.32      | 27.68   | positive |
| 23  | 62504989   | COBAS  | 24.93        | positive | 22.86      | 23.46   | positive |
| 24  | 62520965   | NaCl   | 25.00        | positive | 25.18      | 25.13   | positive |
| 25  | 62505068   | COBAS  | 25.13        | positive | 22.02      | 22.75   | positive |
| 26  | 62524029   | NaCl   | 25.35        | positive | 28.51      | 28.6    | positive |
| 27  | 62511485   | NaCl   | 26.00        | positive | 30.16      | 30.23   | positive |
| 28  | 6251206827 | COBAS  | 26.17        | positive | 24.03      | 25.68   | positive |
| 29  | 62505059   | COBAS  | 26.19        | positive | 24.06      | 24.6    | positive |
| 30  | 6900159327 | COBAS  | 26.89        | positive | 26.43      | 27.74   | positive |
| 31  | 62517260   | NaCl   | 27.00        | positive | 28.12      | 27.84   | positive |
| 32  | 62516844   | NaCl   | 27.19        | positive | 28.36      | 28.28   | positive |
| 33  | 62515653   | NaCl   | 27.48        | positive | 29.34      | 30.63   | positive |
| 34  | 62505198   | COBAS  | 27.57        | positive | 21.87      | 22.5    | positive |
| 35  | 62513742   | NaCl   | 27.61        | positive | 26.02      | 26.32   | positive |
| 36  | 6900159827 | COBAS  | 27.73        | positive | 25.32      | 26.39   | positive |
| 37  | 62505219   | COBAS  | 27.84        | positive | 26.13      | 27.16   | positive |
| 38  | 62504893   | COBAS  | 27.88        | positive | 22.81      | 23.59   | positive |
| 39  | 62518965   | COBAS  | 28.00        | positive | 31.7       | 32.66   | positive |
| 40  | 6250927527 | NaCl   | 28.76        | positive | 36.16      | 36.81   | positive |
| 41  | 62505672   | COBAS  | 28.85        | positive | 26.22      | 27.1    | positive |
| 42  | 62520042   | COBAS  | 28.90        | positive | 28.64      | 29.45   | positive |
| 43  | 62505067   | COBAS  | 29.11        | positive | 26.54      | 27.34   | positive |

|    |            |       |       |          |       |       |              |
|----|------------|-------|-------|----------|-------|-------|--------------|
| 44 | 62506529   | COBAS | 29.26 | positive | 22.22 | 22.98 | positive     |
| 45 | 6251205627 | COBAS | 29.58 | positive | 28.65 | 29.68 | positive     |
| 46 | 62511450   | NaCl  | 29.60 | positive | 32.25 | 32.83 | positive     |
| 47 | 62519301   | NaCl  | 29.67 | positive | 30.72 | 32.17 | positive     |
| 48 | 62534743   | NaCl  | 29.77 | positive | 33.19 | 34.8  | positive     |
| 49 | 62528467   | NaCl  | 29.82 | positive | 35.54 | 37.22 | positive     |
| 50 | 6250969527 | NaCl  | 29.88 | positive | 34.6  | 36.29 | positive     |
| 51 | 62520507   | NaCl  | 30.00 | positive | 35.6  | 37.06 | positive     |
| 52 | 62520549   | NaCl  | 30.00 | positive | 32.69 | 34.02 | positive     |
| 53 | 62520899   | NaCl  | 30.00 | positive | 31.28 | 31.53 | positive     |
| 54 | 62519541   | NaCl  | 30.49 | positive | 30.76 | 31.53 | positive     |
| 55 | 62517116   | NaCl  | 30.70 | positive | 33.32 | 33.93 | positive     |
| 56 | 62519879   | COBAS | 30.72 | positive | 28.51 | 29    | positive     |
| 57 | 62511451   | NaCl  | 31.00 | positive | 36.63 | 37.45 | positive     |
| 58 | 62520555   | NaCl  | 31.00 | positive | .     | 37.06 | inconclusive |
| 59 | 62528415   | NaCl  | 31.16 | positive | .     | 39.11 | inconclusive |
| 60 | 62505666   | COBAS | 31.30 | positive | 29.37 | 30    | positive     |
| 61 | 62524355   | COBAS | 31.46 | positive | 32.73 | 34.23 | positive     |
| 62 | 6250980827 | NaCl  | 31.66 | positive | .     | .     | negative     |
| 63 | 62511433   | NaCl  | 32.00 | positive |       |       | negative     |
| 64 | 62517221   | NaCl  | 32.00 | positive | 34.83 | 36.74 | positive     |
| 65 | 62517230   | NaCl  | 32.00 | positive | .     | .     | negative     |
| 66 | 62520603   | COBAS | 32.00 | positive | 32.11 | 32.53 | positive     |
| 67 | 6251205827 | COBAS | 32.00 | positive | 32.08 | 33.83 | positive     |
| 68 | 62505326   | COBAS | 32.20 | positive | 30.18 | 30.95 | positive     |
| 69 | 6251207027 | COBAS | 32.30 | positive | 33.04 | 34.09 | positive     |
| 70 | 62515610   | NaCl  | 32.35 | positive |       |       | negative     |
| 71 | 62511888   | NaCl  | 32.60 | positive | 38.86 | 38.76 | positive     |
| 72 | 62524685   | NaCl  | 32.90 | positive | 38.21 | .     | inconclusive |
| 73 | 62515633   | NaCl  | 33.00 | positive |       |       | negative     |
| 74 | 62520081   | COBAS | 33.00 | positive | 34.88 | 37.01 | positive     |
| 75 | 62520488   | COBAS | 33.00 | positive | 32.2  | 32.33 | positive     |
| 76 | 62524053   | NaCl  | 33.20 | positive | 36.06 | 38.71 | positive     |
| 77 | 62535117   | NaCl  | 33.25 | positive | .     | .     | negative     |
| 78 | 62505237   | COBAS | 33.30 | positive | 30.24 | 31.15 | positive     |
| 79 | 62520472   | NaCl  | 34.00 | positive | 32.4  | 31.96 | positive     |
| 80 | 62520502   | NaCl  | 34.00 | positive | .     | 36.93 | inconclusive |
| 81 | 62520909   | NaCl  | 34.00 | positive | .     | .     | negative     |
| 82 | 62520982   | NaCl  | 34.00 | positive | .     | .     | negative     |
| 83 | 6900155127 | COBAS | 34.00 | positive | 35.81 | 36.64 | positive     |
| 84 | 62534773   | NaCl  | 34.05 | positive | 38.35 | .     | inconclusive |
| 85 | 62534801   | NaCl  | 34.25 | positive | .     | 39.25 | inconclusive |
| 86 | 62528772   | NaCl  | 34.68 | positive | 35.02 | 37.03 | positive     |
| 87 | 62505191   | COBAS | 34.84 | positive | 31.15 | 32.06 | positive     |
| 88 | 62520557   | NaCl  | 35.00 | positive | .     | .     | negative     |
| 89 | 62520866   | NaCl  | 35.00 | positive | .     | .     | negative     |
| 90 | 62528437   | NaCl  | 35.33 | positive | .     | .     | negative     |
| 91 | 6900149127 | COBAS | 35.33 | positive | 36.08 | 38.38 | positive     |
| 92 | 62534802   | NaCl  | 35.65 | positive | .     | .     | negative     |

|     |            |       |       |          |       |       |              |
|-----|------------|-------|-------|----------|-------|-------|--------------|
| 93  | 62520211   | COBAS | 35.72 | positive | 30.68 | 31.06 | positive     |
| 94  | 80272462   | COBAS | 35.96 | positive | 37.86 | 39.2  | positive     |
| 95  | 62520130   | COBAS | 36.00 | positive | 36.63 | 39.33 | positive     |
| 96  | 62534234   | NaCl  | 36.00 | positive | .     | .     | negative     |
| 97  | 6900153427 | COBAS | 36.00 | positive | 37.24 | 36.8  | positive     |
| 98  | 62519520   | NaCl  | 36.11 | positive | 34.84 | 36.32 | positive     |
| 99  | 62528419   | NaCl  | 36.29 | positive | .     | .     | negative     |
| 100 | 62534745   | NaCl  | 36.57 | positive | .     | .     | negative     |
| 101 | 62534246   | NaCl  | 36.62 | positive | .     | 45.95 | inconclusive |
| 102 | 62534794   | NaCl  | 36.69 | positive | .     | .     | negative     |
| 103 | 62505263   | COBAS | 36.93 | positive | 32.38 | 33.77 | positive     |
| 104 | 62517264   | NaCl  | 37.00 | positive | .     | .     | negative     |
| 105 | 62520508   | NaCl  | 37.00 | positive | 37.04 | 39.12 | positive     |
| 106 | 62520929   | COBAS | 37.00 | positive | .     | .     | negative     |
| 107 | 62524024   | NaCl  | 37.06 | positive | 38.03 | 39.13 | positive     |
| 108 | 62506506   | COBAS | 37.86 | positive | 29.63 | 30.49 | positive     |
| 109 | 62520969   | NaCl  | 38.00 | positive | .     | .     | negative     |
| 110 | 62524031   | NaCl  | 38.03 | positive | 38.53 | .     | inconclusive |
| 111 | 6900159427 | COBAS | 38.04 | positive | 38.61 | 38.17 | positive     |
| 112 | 62519536   | NaCl  | 38.22 | positive | .     | .     | negative     |
| 113 | 62519510   | NaCl  | 38.23 | positive | 38.27 | .     | inconclusive |
| 114 | 62534752   | NaCl  | 38.62 | positive | .     | .     | negative     |
| 115 | 62506509   | COBAS | 38.66 | positive | .     | 34.38 | inconclusive |
| 116 | 62534696   | COBAS | 39.77 | positive | .     | .     | negative     |
| 117 | 62505178   | COBAS | 40.00 | positive | 34.97 | 33.27 | positive     |
| 118 | 62513424   | COBAS |       | negative | 29.01 | 30.21 | positive     |
| 119 | 62513391   | COBAS |       | negative | 31.39 | 32.39 | positive     |
| 120 | 62523**5   | COBAS |       | negative | 33.57 | 35.28 | positive     |
| 121 | 62511893   | NaCl  |       | negative | 34.86 | 37.55 | positive     |
| 122 | 62542141   | NaCl  |       | negative | 38.64 |       | inconclusive |
| 123 | 62505732   | COBAS |       | negative | .     | 43.62 | inconclusive |
| 124 | 62541641   | NaCl  |       | negative |       | 41.48 | inconclusive |
| 125 | 62513009   | COBAS |       | negative | .     | .     | negative     |
| 126 | 62513226   | COBAS |       | negative | .     | .     | negative     |
| 127 | 62513270   | COBAS |       | negative | .     | .     | negative     |
| 128 | 62513299   | COBAS |       | negative | .     | .     | negative     |
| 129 | 62513326   | COBAS |       | negative | .     | .     | negative     |
| 130 | 62513343   | COBAS |       | negative | .     | .     | negative     |
| 131 | 62513359   | COBAS |       | negative | .     | .     | negative     |
| 132 | 62513386   | COBAS |       | negative | .     | .     | negative     |
| 133 | 62513402   | COBAS |       | negative | .     | .     | negative     |
| 134 | 62513430   | COBAS |       | negative | .     | .     | negative     |
| 135 | 69001390   | COBAS |       | negative | .     | .     | negative     |
| 136 | 69001391   | COBAS |       | negative | .     | .     | negative     |
| 137 | 69001392   | COBAS |       | negative | .     | .     | negative     |
| 138 | 69001393   | COBAS |       | negative | .     | .     | negative     |
| 139 | 69001396   | COBAS |       | negative | .     | .     | negative     |
| 140 | 69001397   | COBAS |       | negative | .     | .     | negative     |
| 141 | 69001398   | COBAS |       | negative | .     | .     | negative     |

|     |            |       |          |   |   |          |
|-----|------------|-------|----------|---|---|----------|
| 142 | 62517222   | NaCl  | negative | . | . | negative |
| 143 | 62518590   | NaCl  | negative | . | . | negative |
| 144 | 62505726   | COBAS | negative | . | . | negative |
| 145 | 62505728   | COBAS | negative | . | . | negative |
| 146 | 62505730   | COBAS | negative | . | . | negative |
| 147 | 62522862   | COBAS | negative | . | . | negative |
| 148 | 62522868   | NaCl  | negative | . | . | negative |
| 149 | 62522873   | NaCl  | negative | . | . | negative |
| 150 | 62522894   | COBAS | negative | . | . | negative |
| 151 | 62522905   | COBAS | negative | . | . | negative |
| 152 | 62522916   | COBAS | negative | . | . | negative |
| 153 | 62522925   | COBAS | negative | . | . | negative |
| 154 | 62522927   | COBAS | negative | . | . | negative |
| 155 | 62522964   | COBAS | negative | . | . | negative |
| 156 | 62522988   | COBAS | negative | . | . | negative |
| 157 | 62522996   | COBAS | negative | . | . | negative |
| 158 | 62522997   | COBAS | negative | . | . | negative |
| 159 | 62523008   | COBAS | negative | . | . | negative |
| 160 | 62523027   | COBAS | negative | . | . | negative |
| 161 | 62523031   | COBAS | negative | . | . | negative |
| 162 | 62523034   | COBAS | negative | . | . | negative |
| 163 | 62523076   | COBAS | negative | . | . | negative |
| 164 | 62523097   | COBAS | negative | . | . | negative |
| 165 | 62523100   | COBAS | negative | . | . | negative |
| 166 | 62523289   | COBAS | negative | . | . | negative |
| 167 | 62523299   | COBAS | negative | . | . | negative |
| 168 | 62523312   | COBAS | negative | . | . | negative |
| 169 | 62523313   | COBAS | negative | . | . | negative |
| 170 | 62523314   | COBAS | negative | . | . | negative |
| 171 | 62523316   | COBAS | negative | . | . | negative |
| 172 | 62523326   | COBAS | negative | . | . | negative |
| 173 | 6900157027 | COBAS | negative | . | . | negative |
| 174 | 62532907   | COBAS | negative | . | . | negative |
| 175 | 62532936   | COBAS | negative | . | . | negative |
| 176 | 62532968   | COBAS | negative | . | . | negative |
| 177 | 62532971   | COBAS | negative | . | . | negative |
| 178 | 62532972   | COBAS | negative | . | . | negative |
| 179 | 62532985   | COBAS | negative | . | . | negative |
| 180 | 62532988   | COBAS | negative | . | . | negative |
| 181 | 62532993   | COBAS | negative | . | . | negative |
| 182 | 62533002   | COBAS | negative | . | . | negative |
| 183 | 62533004   | COBAS | negative | . | . | negative |
| 184 | 62533033   | COBAS | negative | . | . | negative |
| 185 | 62533036   | COBAS | negative | . | . | negative |
| 186 | 62533039   | COBAS | negative | . | . | negative |
| 187 | 6254993327 | COBAS | negative | . | . | negative |
| 188 | 6255101827 | COBAS | negative | . | . | negative |
| 189 | 6255113727 | COBAS | negative | . | . | negative |
| 190 | 6255116427 | NaCl  | negative | . | . | negative |

|     |            |       |          |   |   |          |
|-----|------------|-------|----------|---|---|----------|
| 191 | 6255116827 | NaCl  | negative | . | . | negative |
| 192 | 6255117427 | NaCl  | negative | . | . | negative |
| 193 | 6255117627 | NaCl  | negative | . | . | negative |
| 194 | 6255117827 | NaCl  | negative | . | . | negative |
| 195 | 6255118027 | NaCl  | negative | . | . | negative |
| 196 | 6255118127 | NaCl  | negative | . | . | negative |
| 197 | 6255118427 | NaCl  | negative | . | . | negative |
| 198 | 6255118527 | NaCl  | negative | . | . | negative |
| 199 | 6255118727 | NaCl  | negative | . | . | negative |
| 200 | 6255119027 | NaCl  | negative | . | . | negative |
| 201 | 6255119227 | NaCl  | negative | . | . | negative |
| 202 | 6255119427 | NaCl  | negative | . | . | negative |
| 203 | 6255119527 | NaCl  | negative | . | . | negative |
| 204 | 6255119627 | NaCl  | negative | . | . | negative |
| 205 | 6255119827 | NaCl  | negative | . | . | negative |
| 206 | 6255120527 | NaCl  | negative | . | . | negative |
| 207 | 6900181727 | COBAS | negative | . | . | negative |
| 208 | 6900181827 | COBAS | negative | . | . | negative |
| 209 | 6900230027 | COBAS | negative | . | . | negative |
| 210 | 6900230827 | COBAS | negative | . | . | negative |
| 211 | 6900231127 | COBAS | negative | . | . | negative |
| 212 | 62541615   | NaCl  | negative |   |   | negative |
| 213 | 62541616   | NaCl  | negative |   |   | negative |
| 214 | 62541618   | NaCl  | negative |   |   | negative |
| 215 | 62541621   | NaCl  | negative |   |   | negative |
| 216 | 62541624   | NaCl  | negative |   |   | negative |
| 217 | 62541631   | NaCl  | negative |   |   | negative |
| 218 | 62541643   | NaCl  | negative |   |   | negative |
| 219 | 62541656   | NaCl  | negative |   |   | negative |

Shown are 219 samples collected in COBAS buffer or NaCl that have been initially measured with the Roche COBAS system and finally analysed for our in-house system (JKU system) using the two virus-specific probes N1 and N2. Samples are classified due to their viral load according to the COBAS system: high viral load,  $C_q \leq 30$ , blue; low viral load,  $C_q > 30$ , green; negative, no signal detection, black.

**Table S2.** Differences in SARS-CoV-2 detection between KUK and JKU for samples with low viral load (Cq > 30).

| No. | Sample-ID      | COBAS System |      |          | JKU System - Replicate 1 |         |         |                   | JKU System - Replicate 2 |         |         |                   |
|-----|----------------|--------------|------|----------|--------------------------|---------|---------|-------------------|--------------------------|---------|---------|-------------------|
|     |                | Buffer       | Cq   | Result   | Cq (N1)                  | Cq (N2) | Cq (RP) | Result            | Cq (N1)                  | Cq (N2) | Cq (RP) | Result            |
| 1   | 62505732       | COBAS        | n.a. | negative | n.a.                     | 43.62   | 24.92   | inconclu-<br>sive | n.a.                     | n.a.    | 24.88   | negative          |
| 2   | 62506509       | COBAS        | 38.7 | positive | n.a.                     | 34.38   | 21.16   | inconclu-<br>sive | 34.94                    | 35.81   | 21.13   | positive          |
| 3   | 62513391       | COBAS        | n.a. | negative | 31.39                    | 32.39   | 25.79   | positive          | n.a.                     | 38.27   | 22.84   | inconclu-<br>sive |
| 4   | 62513424       | COBAS        | n.a. | negative | 29.01                    | 30.21   | 26.01   | positive          | n.a.                     | n.a.    | 24.83   | negative          |
| 5   | 62520929       | COBAS        | 37.0 | positive | n.a.                     | n.a.    | 27.27   | negative          | n.a.                     | n.a.    | 27.05   | negative          |
| 6   | 62523**5       | COBAS        | n.a. | negative | 33.57                    | 35.28   | 24.62   | positive          | 35.55                    | 36.69   | 26.31   | positive          |
| 7   | 62534696       | COBAS        | 39.8 | positive | n.a.                     | n.a.    | 26.39   | negative          | n.a.                     | n.a.    | 27.11   | negative          |
| 8   | 69002107<br>27 | COBAS        | n.a. | negative | 39.62                    | 38.66   | 25.25   | positive          |                          |         |         |                   |
| 1   | 62517264       | NaCl         | 37.0 | positive | n.a.                     | n.a.    | 32.23   | negative          | n.a.                     | n.a.    | 32.93   | negative          |
| 2   | 62517230       | NaCl         | 32.0 | positive | n.a.                     | n.a.    | 28.94   | negative          |                          |         |         |                   |
| 3   | 62520969       | NaCl         | 38.0 | positive | n.a.                     | n.a.    | 29.4    | negative          | n.a.                     | n.a.    | 28.34   | negative          |
| 4   | 62520909       | NaCl         | 34.0 | positive | n.a.                     | n.a.    | 33.95   | negative          | n.a.                     | n.a.    | 33.68   | negative          |
| 5   | 62520866       | NaCl         | 35.0 | positive | n.a.                     | n.a.    | 33.52   | negative          | 35.83                    | n.a.    | 33      | inconclu-<br>sive |
| 6   | 62520565       | NaCl         | 33.0 | positive | n.a.                     | n.a.    | n.a.    | invalid           | n.a.                     | n.a.    | 40.3    | negative          |
| 7   | 62520555       | NaCl         | 31.0 | positive | n.a.                     | 37.06   | 32.97   | inconclu-<br>sive | n.a.                     | 34.45   | 32.52   | inconclu-<br>sive |
| 8   | 62520502       | NaCl         | 34.0 | positive | n.a.                     | 36.93   | 26.92   | inconclu-<br>sive | n.a.                     | n.a.    | 26.22   | negative          |
| 9   | 62520982       | NaCl         | 34.0 | positive | n.a.                     | n.a.    | 34.68   | negative          | 37.33                    | 38.43   | 32.79   | positive          |
| 10  | 62520557       | NaCl         | 35.0 | positive | n.a.                     | n.a.    | 37.57   | negative          | 38.61                    | n.a.    | 33.43   | inconclu-<br>sive |
| 11  | 62528419       | NaCl         | 36.3 | positive | n.a.                     | n.a.    | 28.38   | negative          | 37.26                    | 37.83   | 27.77   | positive          |
| 12  | 62524031       | NaCl         | 38.0 | positive | 38.53                    | n.a.    | 29.17   | inconclu-<br>sive |                          |         |         |                   |
| 13  | 62528437       | NaCl         | 35.3 | positive | n.a.                     | n.a.    | 27.72   | negative          | n.a.                     | n.a.    | 28.56   | negative          |
| 14  | 62528415       | NaCl         | 31.2 | positive | n.a.                     | 39.11   | 27.26   | inconclu-<br>sive | 33.84                    | 34.65   | 28      | positive          |
| 15  | 62524685       | NaCl         | 32.9 | positive | 38.21                    | n.a.    | 29.45   | inconclu-<br>sive | 37.03                    | 39.07   | 28.54   | positive          |
| 16  | 62512003       | NaCl         | 37.0 | positive | n.a.                     | n.a.    | 32.19   | negative          | n.a.                     | n.a.    | 32.43   | negative          |
| 17  | 62516229       | NaCl         | 38.0 | positive | n.a.                     | n.a.    | 31.73   | negative          | n.a.                     | n.a.    | 31.06   | negative          |
| 18  | 62534246       | NaCl         | 36.6 | positive | n.a.                     | 45.95   | 27.39   | inconclu-<br>sive | n.a.                     | n.a.    | 27.72   | negative          |
| 19  | 62534234       | NaCl         | 36.0 | positive | n.a.                     | n.a.    | 28.59   | negative          | n.a.                     | n.a.    | 28.77   | negative          |
| 20  | 62534745       | NaCl         | 36.6 | positive | n.a.                     | n.a.    | 28.34   | negative          | n.a.                     | n.a.    | 28.62   | negative          |
| 21  | 62519536       | NaCl         | 38.2 | positive | n.a.                     | n.a.    | 34.14   | negative          | n.a.                     | n.a.    | 34.65   | negative          |
| 22  | 62519510       | NaCl         | 38.2 | positive | 38.27                    | n.a.    | 28.27   | inconclu-<br>sive | n.a.                     | n.a.    | 29.01   | negative          |
| 23  | 62534802       | NaCl         | 35.7 | positive | n.a.                     | n.a.    | 31.66   | negative          | n.a.                     | n.a.    | 30.35   | negative          |
| 24  | 62535117       | NaCl         | 33.3 | positive | n.a.                     | n.a.    | 33.48   | negative          | n.a.                     | n.a.    | 34.61   | negative          |
| 25  | 62534801       | NaCl         | 34.3 | positive | n.a.                     | 39.25   | 31.08   | inconclu-<br>sive | n.a.                     | n.a.    | 30.76   | negative          |
| 26  | 62534794       | NaCl         | 36.7 | positive | n.a.                     | n.a.    | 32.57   | negative          | n.a.                     | n.a.    | 32.02   | negative          |
| 27  | 62534752       | NaCl         | 38.6 | positive | n.a.                     | n.a.    | 31.57   | negative          | n.a.                     | n.a.    | 31.11   | negative          |
| 28  | 62534773       | NaCl         | 34.1 | positive | 38.35                    | n.a.    | 32.11   | inconclu-<br>sive | n.a.                     | 39.95   | 33.25   | inconclu-<br>sive |

**Table S3.** Ring trial reflecting the sensitivity and specificity of our assay.

| COBAS System |       |          | JKU System<br>Replicate 1 (Luna) |         |          | JKU System<br>Replicate 2 (TaqMan) |         |          |
|--------------|-------|----------|----------------------------------|---------|----------|------------------------------------|---------|----------|
| Type         | Cq    | Result   | Cq (N1)                          | Cq (N2) | Result   | Cq (N1)                            | Cq (N2) | Result   |
| ring trial 1 | 22.18 | positive | 26.38                            | 27.05   | positive | 27.23                              | 28.52   | positive |
| ring trial 2 | n.a.  | negative | n.a.                             | n.a.    | negative | n.a.                               | n.a.    | negative |
| ring trial 3 | 31.38 | positive | 35.48                            | 35.89   | positive | 36.9                               | 37.77   | positive |
| ring trial 4 | 25.45 | positive | 29.24                            | 30.27   | positive | 30.26                              | 31.77   | positive |
| ring trial 5 | n.a.  | negative | n.a.                             | n.a.    | negative | n.a.                               | n.a.    | negative |
| ring trial 6 | 29.01 | positive | 32.88                            | 34.25   | positive | 33.56                              | 35.42   | positive |
| ring trial 7 | n.a.  | negative | n.a.                             | n.a.    | negative | n.a.                               | n.a.    | negative |
| RNA control  |       |          | 20.1                             | 20.5    |          | 20.75                              | 19.93   |          |
| NTC          |       |          | n.a.                             | n.a.    |          | n.a.                               | n.a.    |          |

Seven samples were included in the ring trial and have been measured by the COBAS system and our system (JKU system) in two replicates using the two RT-qPCR kits, Luna and TaqMan, for one of the replicated measurements each. As RNA control,  $10^5$  copies of the Twist Synthetic SARS-CoV-2 RNA was used, and one reaction was performed for each target without adding a PCR template (no-template control, NTC).

**Table S4.** Technical sensitivity and reproducibility using SARS-CoV-2 RNA control.

| RNA Copies                  | Replicates | RNA control |            |       | Cq (N2) | Average Cq | Stdev |
|-----------------------------|------------|-------------|------------|-------|---------|------------|-------|
|                             |            | Cq (N1)     | Average Cq | Stdev |         |            |       |
| 10 <sup>2</sup>             | 4×         | 35.35       | 35.44      | 0.47  | 36.05   | 35.77      | 0.27  |
| 10 <sup>2</sup>             |            | 34.98       |            |       | 35.87   |            |       |
| 10 <sup>2</sup>             |            | 35.32       |            |       | 35.4    |            |       |
| 10 <sup>2</sup>             |            | 36.1        |            |       | 35.76   |            |       |
| 10 <sup>3</sup>             | 4×         | 31.9        | 32.04      | 0.20  | 32.41   | 32.44      | 0.17  |
| 10 <sup>3</sup>             |            | 31.89       |            |       | 32.57   |            |       |
| 10 <sup>3</sup>             |            | 32.31       |            |       | 32.21   |            |       |
| 10 <sup>3</sup>             |            | 32.06       |            |       | 32.55   |            |       |
| 10 <sup>4</sup>             | 4×         | 28.41       | 28.49      | 0.15  | 29.03   | 28.76      | 0.19  |
| 10 <sup>4</sup>             |            | 28.72       |            |       | 28.71   |            |       |
| 10 <sup>4</sup>             |            | 28.43       |            |       | 28.71   |            |       |
| 10 <sup>4</sup>             |            | 28.41       |            |       | 28.58   |            |       |
| 10 <sup>5</sup>             | 8×         | 24.95       | 24.98      | 0.16  | 24.83   | 24.88      | 0.26  |
| 10 <sup>5</sup>             |            | 25.06       |            |       | 24.92   |            |       |
| 10 <sup>5</sup>             |            | 25.22       |            |       | 24.57   |            |       |
| 10 <sup>5</sup>             |            | 24.81       |            |       | 24.6    |            |       |
| 10 <sup>5</sup>             |            | 24.74       |            |       | 24.87   |            |       |
| 10 <sup>5</sup>             |            | 24.95       |            |       | 25.12   |            |       |
| 10 <sup>5</sup>             |            | 25.14       |            |       | 24.8    |            |       |
| 10 <sup>5</sup>             |            | 24.97       |            |       | 25.36   |            |       |
| <b>R2</b>                   |            | 0.9966      |            |       | 0.9968  |            |       |
| <b>Efficiency (E-slope)</b> |            | 88%         |            |       | 93%     |            |       |

Different dilutions of RNA positive control have been used for RT-qPCR in four or eight replicated measurements.



Table S5. Sensitivity limits of two patient samples.

| Sample 1 (#62505679) |        |         |            |       |         |            |       |         |            |       |              |
|----------------------|--------|---------|------------|-------|---------|------------|-------|---------|------------|-------|--------------|
| Dilution             | Buffer | Cq (N1) | Average Cq | Stdev | Cq (N2) | Average Cq | Stdev | Cq (RP) | Average Cq | Stdev | Result       |
| 1:1                  | COBAS  | 21.20   | 21.26      | 0.08  | 22.18   | 22.14      | 0.06  | 27.00   | 27.04      | 0.05  | positive     |
| 1:1                  | COBAS  | 21.31   |            |       | 22.10   |            |       | 27.07   |            |       | positive     |
| 1:10                 | COBAS  | 25.20   | 25.23      | 0.04  | 25.96   | 25.95      | 0.02  | 31.01   | 31.10      | 0.12  | positive     |
| 1:10                 | COBAS  | 25.26   |            |       | 25.93   |            |       | 31.18   |            |       | positive     |
| 1:100                | COBAS  | 30.47   | 30.30      | 0.25  | 31.13   | 31.20      | 0.10  | 37.10   | 37.25      | 0.21  | positive     |
| 1:100                | COBAS  | 30.12   |            |       | 31.27   |            |       | 37.39   |            |       | positive     |
| 1:1000               | COBAS  | 34.51   | 34.39      | 0.18  | 35.78   | 33.82      | 2.78  | 40.07   | 39.51      | 0.79  | positive     |
| 1:1000               | COBAS  | 34.26   |            |       | 31.85   |            |       | 38.95   |            |       | positive     |
| R2                   |        | 0.97    |            |       | 0.94    |            |       | 0.99    |            |       |              |
| Efficiency (E-slope) |        | 70%     |            |       | 77%     |            |       | 68%     |            |       |              |
| Sample 2 (#62505672) |        |         |            |       |         |            |       |         |            |       |              |
| Dilution             | Buffer | Cq (N1) | Average Cq | Stdev | Cq (N2) | Average Cq | Stdev | Cq (RP) | Average Cq | Stdev | Result       |
| 1:1                  | COBAS  | 26.35   | 26.30      | 0.08  | 27.10   | 27.13      | 0.04  | 23.87   | 23.56      | 0.44  | positive     |
| 1:1                  | COBAS  | 26.24   |            |       | 27.15   |            |       | 23.25   |            |       | positive     |
| 1:10                 | COBAS  | 29.66   | 29.75      | 0.12  | 31.51   | 31.08      | 0.62  | 26.15   | 26.07      | 0.11  | positive     |
| 1:10                 | COBAS  | 29.83   |            |       | 30.64   |            |       | 25.99   |            |       | positive     |
| 1:100                | COBAS  | 33.79   | 33.56      | 0.33  | 34.76   | 34.73      | 0.04  | 30.36   | 30.17      | 0.27  | positive     |
| 1:100                | COBAS  | 33.32   |            |       | 34.70   |            |       | 29.98   |            |       | positive     |
| 1:1000               | COBAS  | 37.46   | 37.46      |       | 39.34   | 39.22      | 0.17  | 33.73   | 34.03      | 0.42  | positive     |
| 1:1000               | COBAS  | n.a.    |            |       | 39.10   |            |       | 34.33   |            |       | inconclusive |
| R2                   |        | 0.9867  |            |       | 0.99    |            |       | 0.99    |            |       |              |
| Efficiency (E-slope) |        | 91%     |            |       | 78%     |            |       | 86%     |            |       |              |

Shown is the technical sensitivity and reproducibility using two patient samples in COBAS lysis buffer that have been diluted in a series of 1:10 after extracting viral RNA. For each diluted RNA sample two RT-qPCR replicates were performed.

Table S6. Replicated measurements.

| No. | Sample-ID      | Buffer | COBAS System |          | JKU System - Replicate 1 |         |                   | JKU System - Replicate 2 |         |                   |
|-----|----------------|--------|--------------|----------|--------------------------|---------|-------------------|--------------------------|---------|-------------------|
|     |                |        | Cq           | Result   | Cq (N1)                  | Cq (N2) | Result            | Cq (N1)                  | Cq (N2) | Result            |
| 1   | 62505453       | COBAS  | 20.49        | positive | 19.7                     | 20.03   | positive          | 20.19                    | 20.61   | positive          |
| 2   | 625097642<br>7 | COBAS  | 20.93        | positive | 23.01                    | 24.13   | positive          | 20.21                    | 20.55   | positive          |
| 3   | 62521008       | NaCl   | 21           | positive | 22.53                    | 22.5    | positive          | 22.09                    | 22.51   | positive          |
| 4   | 62520127       | PBS    | 23.45        | positive | 24.94                    | 25.16   | positive          | 24.72                    | 24.9    | positive          |
| 5   | 62517464       | COBAS  | 23.59        | positive | 21.94                    | 22.73   | positive          | 24.27                    | 25.19   | positive          |
| 6   | 62520965       | NaCl   | 25           | positive | 25.18                    | 25.13   | positive          | 25.45                    | 25.51   | positive          |
| 7   | 62517260       | NaCl   | 27.00        | positive | 28.12                    | 27.84   | positive          | 29.83                    | 29.77   | positive          |
| 8   | 62516844       | NaCl   | 27.19        | positive | 28.36                    | 28.28   | positive          | 30.11                    | 30.22   | positive          |
| 9   | 62518965       | COBAS  | 28           | positive | 31.7                     | 32.66   | positive          | 32.72                    | 34.02   | positive          |
| 10  | 62520042       | COBAS  | 28.9         | positive | 28.64                    | 29.45   | positive          | 28.4                     | 28.67   | positive          |
| 11  | 62523536       | PBS    | 29.3         | positive | 31.56                    | 31.87   | positive          | 31                       | 31.56   | positive          |
| 12  | 62519301       | NaCl   | 29.67        | positive | 30.72                    | 32.17   | positive          | 31.31                    | 32.47   | positive          |
| 13  | 62534743       | NaCl   | 29.77        | positive | 33.19                    | 34.8    | positive          | 33.99                    | 35.44   | positive          |
| 14  | 62528467       | NaCl   | 29.82        | positive | 35.54                    | 37.22   | positive          | 32.4                     | 34.3    | positive          |
| 15  | 62529629       | PBS    | 29.99        | positive | 32.05                    | 33.15   | positive          | 32.45                    | 33.4    | positive          |
| 16  | 62520899       | NaCl   | 30           | positive | 31.28                    | 31.53   | positive          | 29.75                    | 30.17   | positive          |
| 17  | 62520549       | NaCl   | 30           | positive | 32.69                    | 34.02   | positive          | 33.18                    | 33.06   | positive          |
| 18  | 62520507       | NaCl   | 30           | positive | 35.6                     | 37.06   | positive          | 42.17                    | 36.08   | positive          |
| 19  | 62519541       | NaCl   | 30.49        | positive | 30.76                    | 31.53   | positive          | 31.5                     | 32.94   | positive          |
| 20  | 62517116       | NaCl   | 30.70        | positive | 33.32                    | 33.93   | positive          | 35.73                    | 36.92   | positive          |
| 21  | 62519879       | COBAS  | 30.72        | positive | 28.51                    | 29      | positive          | 29.49                    | 29.6    | positive          |
| 22  | 62520555       | NaCl   | 31           | positive | n.a.                     | 37.06   | inconclu-<br>sive | n.a.                     | 34.45   | inconclu-<br>sive |
| 23  | 62528415       | NaCl   | 31.16        | positive | n.a.                     | 39.11   | inconclu-<br>sive | 33.84                    | 34.65   | positive          |
| 24  | 62524691       | NaCl   | 31.43        | positive | 34.71                    | 35.57   | positive          | 33.39                    | 33.69   | positive          |
| 25  | 62520603       | COBAS  | 32           | positive | 32.11                    | 32.53   | positive          | 31.69                    | 32.09   | positive          |
| 26  | 62505326       | COBAS  | 32.20        | positive | 30.18                    | 30.95   | positive          | 30.39                    | 31.98   | positive          |
| 27  | 62524685       | NaCl   | 32.9         | positive | 38.21                    | n.a.    | inconclu-<br>sive | 37.03                    | 39.07   | positive          |
| 28  | 62520081       | COBAS  | 33           | positive | 34.88                    | 37.01   | positive          | 37.3                     | 37.91   | positive          |
| 29  | 62520488       | COBAS  | 33           | positive | 32.2                     | 32.33   | positive          | 32.57                    | 32.61   | positive          |
| 30  | 62520565       | NaCl   | 33           | positive | n.a.                     | n.a.    | invalid           | n.a.                     | n.a.    | negative          |
| 31  | 62535117       | NaCl   | 33.25        | positive | n.a.                     | n.a.    | negative          | n.a.                     | n.a.    | negative          |
| 32  | 62524692       | NaCl   | 33.49        | positive | 34.94                    | 34.98   | positive          | 34.94                    | 34.98   | positive          |
| 33  | 690015512<br>7 | COBAS  | 34           | positive | 35.81                    | 36.64   | positive          | 33.75                    | 37.63   | positive          |
| 34  | 62520909       | NaCl   | 34           | positive | n.a.                     | n.a.    | negative          | n.a.                     | n.a.    | negative          |
| 35  | 62520502       | NaCl   | 34           | positive | n.a.                     | 36.93   | inconclu-<br>sive | n.a.                     | n.a.    | negative          |
| 36  | 62520982       | NaCl   | 34           | positive | n.a.                     | n.a.    | negative          | 37.33                    | 38.43   | positive          |
| 37  | 62520472       | NaCl   | 34           | positive | 32.4                     | 31.96   | positive          | 33.21                    | 32.76   | positive          |
| 38  | 62534773       | NaCl   | 34.05        | positive | 38.35                    | n.a.    | inconclu-<br>sive | n.a.                     | 39.95   | inconclu-<br>sive |

|    |                |       |       |          |       |       |                   |       |       |                   |
|----|----------------|-------|-------|----------|-------|-------|-------------------|-------|-------|-------------------|
| 39 | 62534801       | NaCl  | 34.25 | positive | n.a.  | 39.25 | inconclu-<br>sive | n.a.  | n.a.  | negative          |
| 40 | 62520866       | NaCl  | 35    | positive | n.a.  | n.a.  | negative          | 35.83 | n.a.  | inconclu-<br>sive |
| 41 | 62520557       | NaCl  | 35    | positive | n.a.  | n.a.  | negative          | 38.61 | n.a.  | inconclu-<br>sive |
| 42 | 690014912<br>7 | COBAS | 35.33 | positive | 36.08 | 38.38 | positive          | 37.86 | 40.22 | positive          |
| 43 | 62528437       | NaCl  | 35.33 | positive | n.a.  | n.a.  | negative          | n.a.  | n.a.  | negative          |
| 44 | 62534802       | NaCl  | 35.65 | positive | n.a.  | n.a.  | negative          | n.a.  | n.a.  | negative          |
| 45 | 62520211       | COBAS | 35.72 | positive | 30.68 | 31.06 | positive          | 30.83 | 31.31 | positive          |
| 46 | 80272462       | COBAS | 35.96 | positive | 37.86 | 39.2  | positive          | 38.18 | n.a.  | inconclu-<br>sive |
| 47 | 62520130       | COBAS | 36    | positive | 36.63 | 39.33 | positive          | n.a.  | n.a.  | negative          |
| 48 | 690015342<br>7 | COBAS | 36    | positive | 37.24 | 36.8  | positive          | 40.22 | n.a.  | inconclu-<br>sive |
| 49 | 62534234       | NaCl  | 36    | positive | n.a.  | n.a.  | negative          | n.a.  | n.a.  | negative          |
| 50 | 62519520       | NaCl  | 36.11 | positive | 34.84 | 36.32 | positive          | 38.56 | 40.47 | positive          |
| 51 | 62528419       | NaCl  | 36.29 | positive | n.a.  | n.a.  | negative          | 37.26 | 37.83 | positive          |
| 52 | 62534745       | NaCl  | 36.57 | positive | n.a.  | n.a.  | negative          | n.a.  | n.a.  | negative          |
| 53 | 62534246       | NaCl  | 36.62 | positive | n.a.  | 45.95 | inconclu-<br>sive | n.a.  | n.a.  | negative          |
| 54 | 62534794       | NaCl  | 36.69 | positive | n.a.  | n.a.  | negative          | n.a.  | n.a.  | negative          |
| 55 | 62520929       | COBAS | 37    | positive | n.a.  | n.a.  | negative          | n.a.  | n.a.  | negative          |
| 56 | 62517264       | NaCl  | 37.00 | positive | n.a.  | n.a.  | negative          | n.a.  | n.a.  | negative          |
| 57 | 62520508       | NaCl  | 37    | positive | 37.04 | 39.12 | positive          | n.a.  | 39.05 | inconclu-<br>sive |
| 58 | 62512003       | NaCl  | 37    | positive | n.a.  | n.a.  | negative          | n.a.  | n.a.  | negative          |
| 59 | 62524024       | NaCl  | 37.06 | positive | 38.03 | 39.13 | positive          | 36.22 | 37.09 | positive          |
| 60 | 62527697       | NaCl  | 37.9  | positive | 37.49 | 40.18 | positive          | 37.1  | 40.17 | positive          |
| 61 | 62516229       | NaCl  | 37.96 | positive | n.a.  | n.a.  | negative          | n.a.  | n.a.  | negative          |
| 62 | 62520969       | NaCl  | 38    | positive | n.a.  | n.a.  | negative          | n.a.  | n.a.  | negative          |
| 63 | 62519536       | NaCl  | 38.22 | positive | n.a.  | n.a.  | negative          | n.a.  | n.a.  | negative          |
| 64 | 62519510       | NaCl  | 38.23 | positive | 38.27 | n.a.  | inconclu-<br>sive | n.a.  | n.a.  | negative          |
| 65 | 62534752       | NaCl  | 38.62 | positive | n.a.  | n.a.  | negative          | n.a.  | n.a.  | negative          |
| 66 | 62506509       | COBAS | 38.66 | positive | n.a.  | 34.38 | inconclu-<br>sive | 34.94 | 35.81 | positive          |
| 67 | 62534696       | COBAS | 39.77 | positive | n.a.  | n.a.  | negative          | n.a.  | n.a.  | negative          |
| 68 | 62505732       | COBAS | n.a.  | negative | n.a.  | 43.62 | inconclu-<br>sive | n.a.  | n.a.  | negative          |
| 69 | 62513391       | COBAS | n.a.  | negative | 31.39 | 32.39 | positive          | n.a.  | 38.27 | inconclu-<br>sive |
| 70 | 62513424       | COBAS | n.a.  | negative | 29.01 | 30.21 | positive          | n.a.  | n.a.  | negative          |
| 71 | 690015702<br>7 | COBAS | n.a.  | negative | n.a.  | n.a.  | negative          | n.a.  | n.a.  | negative          |
| 72 | 62522905       | COBAS | n.a.  | negative | n.a.  | n.a.  | negative          | n.a.  | n.a.  | negative          |
| 73 | 62522916       | COBAS | n.a.  | negative | n.a.  | n.a.  | negative          | n.a.  | n.a.  | negative          |
| 74 | 62523008       | COBAS | n.a.  | negative | n.a.  | n.a.  | negative          | n.a.  | n.a.  | negative          |
| 75 | 62523031       | COBAS | n.a.  | negative | n.a.  | n.a.  | negative          | 39.16 | 39.7  | positive          |

|    |                |       |      |          |       |       |          |       |       |          |
|----|----------------|-------|------|----------|-------|-------|----------|-------|-------|----------|
| 76 | 62523313       | COBAS | n.a. | negative | n.a.  | n.a.  | negative | n.a.  | n.a.  | negative |
| 77 | 62523299       | COBAS | n.a. | negative | n.a.  | n.a.  | negative | n.a.  | n.a.  | negative |
| 78 | 62523076       | COBAS | n.a. | negative | n.a.  | n.a.  | negative | n.a.  | n.a.  | negative |
| 79 | 62523**5       | COBAS | n.a. | negative | 33.57 | 35.28 | positive | 35.55 | 36.69 | positive |
| 80 | 62523314       | COBAS | n.a. | negative | n.a.  | n.a.  | negative | n.a.  | n.a.  | negative |
| 81 | 62522894       | COBAS | n.a. | negative | n.a.  | n.a.  | negative | n.a.  | n.a.  | negative |
| 82 | 62532907       | COBAS | n.a. | negative | n.a.  | n.a.  | negative | n.a.  | n.a.  | negative |
| 83 | 62533033       | COBAS | n.a. | negative | n.a.  | n.a.  | negative | n.a.  | n.a.  | negative |
| 84 | 62532972       | COBAS | n.a. | negative | n.a.  | n.a.  | negative | n.a.  | n.a.  | negative |
| 85 | 62532968       | COBAS | n.a. | negative | n.a.  | n.a.  | negative | n.a.  | n.a.  | negative |
| 86 | 690018182<br>7 | COBAS | n.a. | negative | n.a.  | n.a.  | negative | n.a.  | n.a.  | negative |
| 87 | 62533002       | COBAS | n.a. | negative | n.a.  | n.a.  | negative | n.a.  | n.a.  | negative |
| 88 | 62532988       | COBAS | n.a. | negative | n.a.  | n.a.  | negative | n.a.  | n.a.  | negative |
| 89 | 62532971       | COBAS | n.a. | negative | n.a.  | n.a.  | negative | n.a.  | n.a.  | negative |
| 90 | 62532985       | COBAS | n.a. | negative | n.a.  | n.a.  | negative | n.a.  | n.a.  | negative |
| 91 | 62532993       | COBAS | n.a. | negative | n.a.  | n.a.  | negative | n.a.  | n.a.  | negative |
| 92 | 62533039       | COBAS | n.a. | negative | n.a.  | n.a.  | negative | n.a.  | n.a.  | negative |
| 93 | 62533004       | COBAS | n.a. | negative | n.a.  | n.a.  | negative | n.a.  | n.a.  | negative |
| 94 | 62533036       | COBAS | n.a. | negative | n.a.  | n.a.  | negative | n.a.  | n.a.  | negative |
| 95 | 62532936       | COBAS | n.a. | negative | n.a.  | n.a.  | negative | n.a.  | n.a.  | negative |
| 96 | 690018172<br>7 | COBAS | n.a. | negative | n.a.  | n.a.  | negative | n.a.  | n.a.  | negative |
| 97 | 62522873       | NaCl  | n.a. | negative | n.a.  | n.a.  | negative | n.a.  | n.a.  | negative |
| 98 | 62522868       | NaCl  | n.a. | negative | n.a.  | n.a.  | negative | n.a.  | n.a.  | negative |

98 patient samples collected in COBAS buffer, NaCl or PBS were initially measured by the COBAS system and analysed with our system (JKU system) in two replicated measurements. The samples were grouped in high viral load ( $C_q \leq 30$ , blue), low viral load ( $C_q > 30$ , green) and not detected (no  $C_q$ , black) based on the COBAS measurements.

**Table S7.** Limit of detection and RNA extraction efficiency.

| Sample type                                                   | Sample-ID                                                     | RNA Extraction Efficiency           |          |         |         |         |
|---------------------------------------------------------------|---------------------------------------------------------------|-------------------------------------|----------|---------|---------|---------|
|                                                               |                                                               | Dilution                            | Buffer   | Cq (N1) | Cq (N2) | Cq (RP) |
| Pool of negative COBAS samples + 1:10 dilution of RNA control | #62523312<br>#62523289<br>#62522964<br>#62522996<br>#62523100 | 10 <sup>6</sup> RNA copies/reaction | COBAS    | 27.13   | 27.05   | 23.21   |
|                                                               |                                                               | 10 <sup>5</sup> RNA copies/reaction | COBAS    | 30.74   | 30.67   | 23.68   |
|                                                               |                                                               | 10 <sup>4</sup> RNA copies/reaction | COBAS    | 33.6    | 33.94   | 23.96   |
|                                                               |                                                               | 10 <sup>3</sup> RNA copies/reaction | COBAS    | 37      | 37.75   | 23.95   |
|                                                               |                                                               | 10 <sup>2</sup> RNA copies/reaction | COBAS    | n.a.    | 40.49   | 23.86   |
|                                                               |                                                               | 1:1                                 | COBAS    | 24.89   | 25.91   | 27.22   |
| 1:5 dilution series of positive COBAS sample                  | Sample 1<br>#62524349                                         | 1:5                                 | buffer 6 | 27.12   | 28.47   | 29.3    |
|                                                               |                                                               | 1:25                                | buffer 6 | 30.05   | 31.27   | 31.85   |
|                                                               |                                                               | 1:125                               | buffer 6 | 32.82   | 33.96   | 35.38   |
|                                                               |                                                               | 1:625                               | buffer 6 | 34.86   | 36.74   | 37.8    |
|                                                               |                                                               | 1:1                                 | COBAS    | 26.37   | 27.13   | 27.28   |
| 1:5 dilution series of positive COBAS sample                  | Sample 2<br>#6900159327                                       | 1:5                                 | buffer 6 | 28.21   | 29.11   | 27.77   |
|                                                               |                                                               | 1:25                                | buffer 6 | 30.72   | 31.68   | 30.48   |
|                                                               |                                                               | 1:125                               | buffer 6 | 34.1    | 35.01   | 33.47   |
|                                                               |                                                               | 1:625                               | buffer 6 | 38.02   | 38.32   | 37.03   |
|                                                               |                                                               | 1:1                                 | COBAS    | 26.37   | 27.13   | 27.28   |

Different copies of positive RNA control were added to a pool of negatively tested patient samples before RNA extraction. In addition, two positive patient samples collected in COBAS buffer were diluted in a 1:5 dilution series using buffer 6 before RNA extraction. For all samples, the complete protocol was performed (RNA extraction + RT-qPCR) to detect the N1, N2 and RP targets.

Table S8. Sample stability.

|        |        | Day 1       |         | Day 1           |              | Day 3   |                 |              |
|--------|--------|-------------|---------|-----------------|--------------|---------|-----------------|--------------|
| Sample | Buffer | Cq (CO-BAS) | Cq (N2) | Cq (E-Sar-beco) | Result       | Cq (N2) | Cq (E-Sar-beco) | Result       |
| 1      | PBS    | n.a.        | n.a.    | n.a.            | negative     | n.a.    | n.a.            | negative     |
| 2      | PBS    | n.a.        | n.a.    | n.a.            | negative     | n.a.    | n.a.            | negative     |
| 3      | PBS    | n.a.        | n.a.    | n.a.            | negative     | n.a.    | n.a.            | negative     |
| 4      | PBS    | n.a.        | n.a.    | n.a.            | negative     | n.a.    | n.a.            | negative     |
| 5      | PBS    | n.a.        | n.a.    | n.a.            | negative     | n.a.    | n.a.            | negative     |
| 6      | PBS    | n.a.        | n.a.    | n.a.            | negative     | n.a.    | n.a.            | negative     |
| 7      | PBS    | n.a.        | n.a.    | n.a.            | negative     | n.a.    | n.a.            | negative     |
| 8      | PBS    | n.a.        | n.a.    | n.a.            | negative     | n.a.    | n.a.            | negative     |
| 9      | PBS    | n.a.        | n.a.    | n.a.            | negative     | n.a.    | n.a.            | negative     |
| 10     | PBS    | n.a.        | n.a.    | n.a.            | negative     | n.a.    | n.a.            | negative     |
| 11     | PBS    | n.a.        | n.a.    | n.a.            | negative     | n.a.    | n.a.            | positive     |
| 12     | PBS    | n.a.        | n.a.    | n.a.            | negative     | n.a.    | n.a.            | negative     |
| 13     | PBS    | n.a.        | n.a.    | n.a.            | negative     | n.a.    | n.a.            | negative     |
| 14     | PBS    | n.a.        | n.a.    | n.a.            | negative     | n.a.    | n.a.            | negative     |
| 15     | PBS    | n.a.        | n.a.    | n.a.            | negative     | n.a.    | n.a.            | negative     |
| 16     | PBS    | 17          | 16.89   | 17.5            | positive     | 19.01   | 19              | positive     |
| 17     | PBS    | 18.63       | 19.91   | 21.57           | positive     | 20.6    | 21.08           | positive     |
| 18     | PBS    | 19.99       | 23.84   | 23.81           | positive     | 24.38   | 24.73           | positive     |
| 19     | PBS    | 20.41       | 21.5    | 22.73           | positive     | 22.96   | 24.13           | positive     |
| 20     | PBS    | 21.77       | 24.82   | 26.01           | positive     | 26.22   | 27.01           | positive     |
| 21     | PBS    | 24.43       | 26.28   | 26.45           | positive     | 28.41   | 28.47           | positive     |
| 22     | PBS    | 26.01       | 27.74   | 28.94           | positive     | 28.19   | 28.37           | positive     |
| 23     | PBS    | 26.97       | 31.73   | 31.71           | positive     | 33.14   | 32.75           | positive     |
| 24     | PBS    | 27.36       | 29.29   | 29.4            | positive     | 30.37   | 30.48           | positive     |
| 25     | PBS    | 27.88       | 34.21   | 34.67           | positive     | 34.33   | 35.32           | positive     |
| 26     | PBS    | 28.9        | 32.1    | 32.44           | positive     | 33.29   | 33.4            | positive     |
| 27     | PBS    | 29.18       | 21.47   | 22.36           | positive     | 22.38   | 23.1            | positive     |
| 28     | PBS    | 30.48       | 31.11   | 31.52           | positive     | 32.39   | 33.46           | positive     |
| 29     | PBS    | 30.61       | 33.42   | 34.14           | positive     | 34.33   | 35.27           | positive     |
| 30     | PBS    | 30.8        | 33.47   | 33.32           | positive     | 34.79   | 35.07           | positive     |
| 31     | PBS    | 32.92       | n.a.    | n.a.            | negative     | n.a.    | 38.12           | inconclusive |
| 32     | PBS    | 33.7        | 39.03   | n.a.            | inconclusive | n.a.    | n.a.            | negative     |
| 33     | PBS    | 33.87       | n.a.    | n.a.            | negative     | n.a.    | n.a.            | negative     |
| 34     | PBS    | 35.19       | n.a.    | 38.47           | inconclusive | n.a.    | n.a.            | negative     |
| 35     | PBS    | 38.21       | n.a.    | n.a.            | negative     | n.a.    | n.a.            | negative     |

35 patient sample collected in PBS buffer have been pre-analysed by the COBAS system and measured with our in-house system at day 1 and 3 using the virus-specific probes N2 and E-Sarbeco. Based on the COBAS results we classified the samples in high viral load (Cq ≤ 30, blue), low viral load (Cq > 30, green) and negative (not detected, black).

Table S9. RP\_2 validation data.

| RP_2 Validation Data |            |          |        |               |             |               |               |                 |
|----------------------|------------|----------|--------|---------------|-------------|---------------|---------------|-----------------|
| ID                   | sample     | Cq COBAS | N2 JKU | E-Sarbeco JKU | RP w RT JKU | RP w/o RT JKU | RP_2 w RT JKU | RP_2 w/o RT JKU |
| 1                    | 9411437727 | n.a.     | n.a.   | n.a.          | 28          | 27.74         | 35.4          | n.a.            |
| 2                    | 9411437527 | n.a.     | n.a.   | n.a.          | 26.39       | 26.47         | 36.05         | n.a.            |
| 3                    | 9411437027 | n.a.     | n.a.   | n.a.          | 29.52       | 29.61         | 37.02         | n.a.            |
| 4                    | 9411439127 | n.a.     | n.a.   | n.a.          | 27.52       | 26.32         | 35.41         | n.a.            |
| 5                    | 9411439027 | n.a.     | n.a.   | n.a.          | 29.43       | 28.75         | n.a.          | n.a.            |
| 6                    | 8028024227 | n.a.     | n.a.   | n.a.          | 33.51       | 32.69         | n.a.          | n.a.            |
| 7                    | 9411435127 | n.a.     | n.a.   | n.a.          | 27.82       | 27.75         | n.a.          | n.a.            |
| 8                    | 9411435327 | n.a.     | n.a.   | n.a.          | 28.5        | 28.49         | 36.28         | n.a.            |
| 9                    | 9411435027 | n.a.     | n.a.   | n.a.          | 31.42       | 31.63         | n.a.          | n.a.            |
| 10                   | 9411437327 | n.a.     | n.a.   | n.a.          | 26.68       | 26.78         | n.a.          | n.a.            |
| 11                   | 9411437227 | n.a.     | n.a.   | n.a.          | 30.63       | 30.81         | 38.14         | n.a.            |
| 12                   | 9411438827 | n.a.     | n.a.   | n.a.          | 32.24       | 32.33         | n.a.          | n.a.            |
| 13                   | 6900500827 | n.a.     | n.a.   | n.a.          | 32.66       | 32.1          | 36.86         | n.a.            |
| 14                   | 6267461427 | n.a.     | n.a.   | n.a.          | 28.01       | 28.28         | 33.59         | n.a.            |
| 15                   | 6267474927 | n.a.     | n.a.   | n.a.          | 29.9        | 29.57         | 36.96         | n.a.            |
| 16                   | 9411408927 | 30.48    | 31.11  | 31.52         | 27.66       | 28.01         | 34.33         | n.a.            |
| 17                   | 7331685527 | 38.21    | n.a.   | n.a.          | 28.22       | 27.65         | n.a.          | n.a.            |
| 18                   | 7331711527 | 28.9     | 32.1   | 32.44         | 31.91       | 32.85         | n.a.          | n.a.            |
| 19                   | 6267121327 | 20.41    | 21.5   | 22.73         | 27.94       | 27.99         | n.a.          | n.a.            |
| 20                   | 9411408827 | 17       | 16.89  | 17.5          | 27.11       | 27.1          | n.a.          | n.a.            |

# Detailed Standard operation Procedure (SOP)

## 1. Test Material

Naso-pharyngeal swabs from patients in different buffers (COBAS, NaCl, and PBS).

## 2. Specimen analysis

### 2.1. Equipment

Regular calibration/maintenance should be performed annually for pipettes and BSC hoods.

- 2× PCR workstation with filtered airflow and UV-light Search (Thermo Scientific MSC-Advantage™ Class II Biological Safety Cabinets; 1.8 m)
- Magnetic Stand 96 well plate (Thermo Fisher, #AM10027) - for plate extractions
- Magnetic Particle Concentrator (MPC) DynaMagnet (Thermo Scientific, #12321D)
- Two Bio-Rad CFX384™ Real-Time System type C1000 thermocycler (Bio-Rad)
- Combispin FVL 2400 with Vortex (Hartenstein)
- Plate centrifuge: Megafuge 16R (Thermo Scientific)
- Rainin Single channel LTS 0.2–10 µL, 2–20 µL, 20–200 µL and 100–1000 µL Pipettes (Mettler Toledo)
- Rainin electronic multichannel E-12 200XLS (Mettler Toledo)
- Rainin E4 LTS 8 channel adjustable 1200 µL pipette (Mettler Toledo)
- Rainin electronic multichannel E-12 1200XLS (Mettler Toledo)
- Rainin electronic multichannel E-12 20XLS (Mettler Toledo)
- Snijders Scientific Ultra Low Freezer –86 °C (evosafe series VF720-86) (Bartelt)
- (PX1 PCR plate sealer (Bio-Rad))

### 2.2. Software

Bio-Rad CFX Manager 3.1

### 2.3. Reagents and Chemicals

#### 2.3.1. RNA extraction

SeraSil-Mag (recently renamed to Sera-Xtracta Virus/Pathogen Kit); (Cytiva, #28990028; LOT: LS-039878)

Other reagents that are not provided in kit:

Ethanol absolute (absolute 99%, for molecular biology; #A80752500PE; Bartelt)

Nuclease-free water (for molecular biology; RNase and DNase free, not DEPC-treated; #AM9932; Thermo Fisher)

#### 2.3.2. RT-qPCR

\*\*authorized to be used for COVID-19 testing by the Centers for Disease Control and Prevention approved by the FDA for emergency use; see <https://www.cdc.gov/coronavirus/2019-ncov/php/testing.html>, accessed on 9 June 2021)

\*\*Primers and probes: 2019-nCoV CDC EUA Kit (IDT, #10006606; LOT: 0000510344)

\*\*TaqMan™ Fast Virus 1-Step Master Mix (Thermo Fisher, #4444432; LOT: 889999)

Luna® Probe One-Step RT-qPCR Kit (NEB, #E3007; LOT: 10072952,)

Positive control: Twist Synthetic SARS-CoV-2 RNA Control 1, Control (102019) (Twist Bioscience, #MT007544.1; LOT: 2000002381)

### 2.4. Primer/Probes



**Table SOP1: Primer/probe sets N1, N2 and RP suggested by CDC.**

| <b>COVID-19 Specific Primers/Probes (2019-nCoV CDC EUA Kit; IDT)</b> |         |                                        |
|----------------------------------------------------------------------|---------|----------------------------------------|
| 2019-nCoV_N1-F                                                       | N-gene  | GACCCCAAAATCAGCGAAAT                   |
| 2019-nCoV_N1-R                                                       | N-gene  | TCTGGTTACTGCCAGTTGAATCTG               |
| 2019-nCoV_N1-P                                                       | N-gene  | FAM-ACCCCGCATTACGTTTGTTG-<br>GACC-BHQ1 |
| 2019-nCoV_N2-F                                                       | N-gene  | TTACAAACATTGGCCGCAAA                   |
| 2019-nCoV_N2-R                                                       | N-gene  | GCGCGACATTCCGAAGAA                     |
| 2019-nCoV_N2-P                                                       | N-gene  | FAM-ACAATTT-<br>GCCCCAGCGCTTCAG-BHQ1   |
| <b>Internal Control Primers (RPP30, RNase P)</b>                     |         |                                        |
| RP-F                                                                 | RNase P | AGATTTGGACCTGCGAGCG                    |
| RP-R                                                                 | RNase P | GAGCGGCTGTCTCCACAAGT                   |
| RP-P                                                                 | RNase P | FAM-TTCTGAC-<br>CTGAAGGCTCTGCGCG-BHQ1  |

### 2.5. Further Consumables

Optical 384-well plates (Bio-Rad, #HSP3865)

Adhesive optical clear RT-PCR plate seals (Bio-Rad, #MSB1001)

Film Sealing Roller for PCR Plates (Bio-Rad)

Clear adhesive film (Thermo Fisher, #4306311 or GE Healthcare, #7704-0001)

Filter tips:

- Rainin LTS, RTL 10F 0.5–20 µL (Mettler Toledo)
- Rainin LTS, RTL 200F 20–200 µL (Mettler Toledo)
- Rainin RT LTS 1200µL F 768A/8 (Mettler Toledo)
- Rainin LTS, RTL 100–1000F µL (Mettler Toledo)

1.6 mL low-binding tubes DNase/RNase free (Biozym, #710176 or Lab Consulting, #28.5101500C-1)

Deep bottom well plates 96W 2ML UNP NPP 25/PK (GE Healthcare, #7701-5200 or Thermo Fisher, #95040450)

Elution plate U-bottom (Macherey-Nagel by GE Healthcare, #740486.24)

Nuclease free Pipetting reservoirs (Channel Mate; StarLab; E1306-2510)

Serological pipettes (Greiner Bio-One, #607180)

(Easy Pierce Heat Sealing Foil 20µm (ThermoFisher, #AB-1720))

## 3. Implementation

### 3.1. Patient Sample Preparation

The naso-pharyngeal swabs are taken in lysis buffer or virus stabilizing buffer. The data is pseudo-anonymized by a barcode used to label each sample. The barcode is linked to the patient's data in the mainframe of the hospital.

### 3.2. General Preparations

For general preparations we followed the guidelines by the Centers for Disease Control and Prevention approved by the FDA for emergency use; see <https://www.cdc.gov/coronavirus/2019-ncov/php/testing.html>, accessed on 9 June 2021).

#### 3.2.1. Primer and Probe Preparation:

Upon receipt, store dried primers and probes at 2–8 °C.

1. Precautions: These reagents should only be handled in a clean area and stored at appropriate temperatures (see below) in the dark. Freeze-thaw cycles should be avoided. Maintain cold when thawed (kept on a cold block at all times during preparation and use)

2. If probes are shipped as a lyophilized powder, using an aseptic technique, suspend dried reagents in nuclease-free water and allow to rehydrate for 15 min at room temperature in the dark, then prepare the primer/probe mix. Currently probes are shipped in pre-mixed solution.
3. Mix gently and aliquot primers/probe in 300 µL volumes into 5 pre-labeled tubes. Store a single aliquot of primers/probe at 2–8 °C in the dark. Do not refreeze (stable for up to 4 months). Store the remaining aliquots at ≤ −20 °C in a non-frost-free freezer, if not used within the next 3–4 weeks.

### 3.2.2. Synthetic SARS-CoV-2 RNA Control Preparation:

1. Precautions: This reagent should be handled with caution in a dedicated nucleic acid handling area to prevent possible contamination. Freeze-thaw cycles should be avoided. Maintain on ice when thawed.
2. Make single use aliquots (approximately 5 µL) and store at ≤ −70°C. Prepare positive control RNA: Twist Synthetic SARS-CoV-2 RNA control 1 (MT007544.1). The control RNA has a concentration of 10<sup>6</sup> copies/µL. Dilution: 0.8 µL + 19.2 µL nuclease-free water = 4 × 10<sup>4</sup> copies/µL; 2.5 µL of the dilution will lead to 10<sup>5</sup> copies/reaction. Prepare a dilution series of 1:10 to finally use 10<sup>5</sup>, 10<sup>4</sup>, 10<sup>3</sup> and 10<sup>2</sup> copies/reaction. These dilutions are used as controls for positive N1 and N2 detection. Note that this control is added also to the RP target, which is expected to render a negative result.
3. Thaw a single aliquot (5 µL at 10<sup>6</sup> copies/µL) of a positive control for 4–5 experiments and prepare the dilutions that are kept on ice until adding to the plate. Keep the remaining stock and dilution sample on ice until further usage. The remaining aliquot is stored in the fridge for approximately a week. Do not freeze and thaw again.

### 3.2.3. No Template Control (NTC)

Sterile, nuclease-free water

Aliquot into volumes of 10 mL

Used to check for contamination during specimen extraction and/or plate set-up

### 3.2.4. Specimens

Specimens can be stored at 2–8 °C for up to a week after collection if in guanidine-containing buffer.

If a delay in extraction is expected, store specimens at −70 °C or lower.

Extracted nucleic acid is stored at −70 °C or lower.

### 3.2.5. Safety

Before starting the specimen handling and RNA extraction:

Clean and decontaminate all work surfaces, centrifuges and other equipment (10% bleach, 70% ethanol, or DNA-off (Takara))

Expose Biological Safety Cabinets with UV for 10 min

### 3.3. Specimen Organization and Preparation

Bar code on the tube with specimen is read and tube is placed on a rack. We recommend depositing swabs using a buffer containing guanidine (COBAS swabs) or our in-house COBAS-like 1× buffer 6. Swabs can also be taken in NaCl or other viral stabilizing collection tubes (e.g. PBS), but these need to be treated with viral inactivation agents achieved for example with the addition of an equivalent volume of 2× buffer 6 (9M Guanidine-Hydrochloride NaCl, 0.1 M Tris-HCl, pH7.4) or buffer 4 (for buffer conditions see Table 6).

### 3.4. Viral RNA Extraction

For this protocol, the following pipettes can be used:

Rainin electronic multichannel E-12 20XLS

Rainin electronic multichannel E-12 200XLS

Rainin electronic multichannel E-12 1200XLS

Rainin E4 LTS 8-multichannel adjustable 1200 µL

**Table SOP2. Overview of programs saved for the Multichannel pipettes.**

| <b>RNA<sup>1</sup>YSIS</b> | <b>SN1000</b>      | <b>TRANSFER</b>    |
|----------------------------|--------------------|--------------------|
| volume: 570 µL             | volume: 1000 µL    | volume: 48 µL      |
| aspirate speed: 5          | aspirate speed: 5  | aspirate speed: 5  |
| dispense speed: 5          | dispense speed: 10 | dispense speed: 10 |
| <b>WASH</b>                | <b>ELUTE</b>       | <b>SAMPLE400</b>   |
| volume: 950 µL             | volume: 50 µL      | volume: 400 µL     |
| aspirate speed: 5          | aspirate speed: 10 | aspirate speed: 5  |
| dispense speed: 5          | dispense speed: 5  | dispense speed: 5  |
| mix speed: 10              | mix speed: 5       | mix speed: 10      |
| mix volume: 750 µL         | mix volume: 30 µL  | mix volume: 700 µL |
| mix cycles: 20             | mix cycles: 20     | mix cycles: 20     |

- Prepare reagents
- Prepare **80% ethanol** wash solution.
- **Note:** Prepare fresh 80% ethanol enough for 950 µL per extraction reaction.
- Prepare a **bead stock mixture** of SeraSil-Mag 400 and SeraSil-Mag 700 beads in a 1:1 ratio. Vortex SeraSil-Mag beads thoroughly before each is added to the pre-mixture and then vortex again prior usage. Add this mixture to a pipetting reservoir if multichannels are used for the next steps.
- **Note:** prepare sufficient bead volume for 20 µL bead mixture per reaction.
- Prepare Proteinase K solution by adding 3 mL nuclease-free water to 60 mg Proteinase K material and dissolve properly to have a final solution of 20 mg/mL. Store the Proteinase K solution then at 2–8 °C (stable for 4 months).

#### Step 1: Lysis and Nucleic Acid Binding

- Add 20 µL of SeraSil-Mag bead mixture to the deep bottom well plates 96-well or 1.6 mL low-binding tubes. This can be done with the Rainin electronic multichannel E-12 20XLS and pipetting reservoir for pipetting out the 96-well plate. Note that each well in these plates holds a volume of 2 mL. There is no need to change tips when pipetting out this master mix.
- **Note:** Prior to adding, vortex the bead mixture carefully
- Add 10 µL of Proteinase K Solution to a well
- Add 570 µL of Binding/Lysis Reagent. This can be done with the Rainin electronic multichannel E-12 1200XLS (select pipette program 'RNA<sup>1</sup>YSIS') and pipetting reservoir.
- **Note:** this buffer is highly viscous and can be foamy. When adding the buffer to the sample, mix carefully by slowly pipetting up/down to avoid multiple bubbles.
- The tubes of the specimens are uncapped and 400 µL of sample are added. This can be done with Rainin E4 LTS 8-multichannel adjustable 1200 µL pipette (select pipette program 'SAMPLE400'). With the same tips, mix by slowly pipetting up/down 20 times.
- **Note:** For tube extractions, vortex the tube for 1 min followed by a quick spin step to remove any droplets on the tube cap. The vortexing step enhances the

extraction efficiency, but we recommend it only with a plate format, if the plate can be sealed with pierceable heat seals or each sample is separated by an empty well to avoid cross-contamination problems. The plate can be vortexed in the TissueLyser for 3 min at 16 Hz and followed by a centrifugation step of the plate in the Megafuge for 2 min at 2,000 g.

- Cover the plate with EasyPierce Seals and heat seal them (175 °C for 2.0 sec) on PX1 PCR plate sealer (Bio-Rad) OR use Clear Adhesive Film (no need for heat sealing with the PX1 PCR plate sealer).
- Heat up water bath to 70 °C. Incubate for 3 min at 70 °C.
- **Note:** heating enhances lysis and activates Proteinase K.
- Place the plate on Magnet Stand-96 for at least 2 min (or until solution becomes clear). If working with tubes, place the tube in the Magnetic Particle Concentrator (MPC). Without disturbing bound beads, carefully remove the entire supernatant (select pipette program 'SN1000').

#### Step 2: Wash the bound RNA

- Carefully mix the Wash Buffer. Remove the plate or tube from the magnetic stand and add 950 µL Wash Buffer. Mix by slowly pipetting up/down 20 times (select pipette program 'WASH').
- Place plate or tube in the magnetic stand for at least 2 min (or until solution becomes clear). Without disturbing bound beads, carefully remove the entire supernatant (select pipette program 'SN1000').
- Remove the plate or tube from the magnetic stand and add 950 µL 80% ethanol. Mix by slowly pipetting up/down 20 times (select pipette program 'WASH').
- Place the plate or tube on the magnetic stand for at least 2 min (or until solution becomes clear). Without disturbing bound beads, carefully remove the entire ethanol (select pipette program 'SN1000').
- **Note:** it is very important that all the ethanol is gone!
- Leave the plate or tube on the magnet and allow beads to dry for 2 min. If necessary, remove remaining ethanol with a small pipette.

#### Step 3: Elution of RNA

- Add 50 µL of nuclease-free water to each sample in the plate or tube. Pipette up and down carefully 20 times to ensure all beads are dissolved (select pipette program 'ELUTE').
- Place plate or tube on the magnetic stand for at least 2 min (or until solution becomes clear).
- Carefully transfer 48 µL eluate containing the extracted RNA to a 96-well Elution plate U-bottom (select pipette program 'TRANSFER').
- Continue with RT-qPCR.

### 3.5. One step RT-qPCR: Same tube Reverse transcription of RNA into cDNA and qPCR

Table SOP3. Master mix for One step RT-qPCR.

| Master Mix for RT-qPCR – Kit 1 (Luna Probe One-Step Reaction Mix) |                                  |                     |         |
|-------------------------------------------------------------------|----------------------------------|---------------------|---------|
| Stock Concentration                                               | Components                       | Final Concentration | 1× [µL] |
| 2×                                                                | Luna Probe One-Step Reaction Mix | 1×                  | 5 µL    |
| 20×                                                               | Luna WarmStart® RT Enzyme Mix    | 1×                  | 0.5 µL  |
| 6.7 µM primer each                                                | Primer/Probe mix                 | 0. 5µM primer each  | 0.75 µL |

|                                                                              |                                     |                                               |                                                 |
|------------------------------------------------------------------------------|-------------------------------------|-----------------------------------------------|-------------------------------------------------|
| 1.7 $\mu$ M probe                                                            | 0.13 $\mu$ M probe                  |                                               |                                                 |
| template RNA                                                                 | $\leq 1 \mu$ g (total RNA)          | 2.5 $\mu$ L                                   |                                                 |
| nuclease-free Water                                                          |                                     | 1.25 $\mu$ L                                  |                                                 |
| <b>Master Mix for RT-qPCR – Kit 2 (TaqMan™ Fast Virus 1-Step Master Mix)</b> |                                     |                                               |                                                 |
| <b>Stock Concentration</b>                                                   | <b>Components</b>                   | <b>Final Concentration</b>                    | <b>1<math>\times</math> [<math>\mu</math>L]</b> |
| 4 $\times$                                                                   | Taqman Fast virus 1-step master mix | 1 $\times$                                    | 2.5 $\mu$ L                                     |
| 6.7 $\mu$ M primer each<br>1.7 $\mu$ M probe                                 | Primer/Probe mix                    | 0.5 $\mu$ M primer each<br>0.13 $\mu$ M probe | 0.75 $\mu$ L                                    |
|                                                                              | template RNA                        | $\leq 1 \mu$ g (total RNA)                    | 2.5 $\mu$ L                                     |
|                                                                              | nuclease-free water                 |                                               | 4.25 $\mu$ L                                    |

Table SOP4. RT-qPCR program.

| Cycle Step            | Temperature | Time                 | Cycles      |
|-----------------------|-------------|----------------------|-------------|
| Priming               | 25 °C       | 2 min                |             |
| Reverse Transcription | 50 °C       | 20 min               | 1           |
| Initial Denaturation  | 95 °C       | 3 min                | 1           |
| Denaturation          | 95 °C       | 15 sec               | 45 $\times$ |
| Extension             | 58 °C       | 10 sec (+plate read) |             |

## 3.5.1. Preparation of Reaction Mixes

- Thaw Luna Probe One-Step Reaction Mix at room temperature, then place on ice. The enzyme mix should stay at  $-20^{\circ}\text{C}$  until needed/added.

OR:

- Thaw TaqMan™ Fast Virus 1-Step Master Mix on ice.
- Primer/Probe mixes are stored at  $4^{\circ}\text{C}$  in dark.
- After thawing completely, briefly mix each component by inversion or pipetting. Spin down quickly.
- Prepare the RT-qPCR Reaction Mix for the number of reactions required plus 10% overage on ice. Briefly mix and spin down quickly.
- Aliquot 7.5  $\mu$ L of assay mix into qPCR plate. Minimize bubbles. Keep plate on cooling block.
- Add 2.5  $\mu$ L extracted RNA to the qPCR plate. Add also 2.5  $\mu$ L of the positive RNA control (positive control) or 2.5  $\mu$ L nuclease-free water (negative control, NTC) in the respectively assigned 384 reaction well. Seal plate with optically transparent film.
- Mix the reaction by tapping on the plate, spin plate briefly to remove bubbles and collect liquid (2 min at 2,000 g).
- start the PCR

## 3.5.2. CFX Plate Loading

- The transfer of the extracted RNA samples from the 96-well U-bottom plate into the 384-well qPCR plate is shown in Figure 5.

## 3.5.3. Set Up qPCR Run

- Start the Bio-Rad CFX manger 3.1 program
- open COVID-19-protocol = 'COVID-19-RT-qPCR'
- select COVID-19-plate-Fluorophore choice = 'FAM plate'
- select CFX thermocycler
- start run

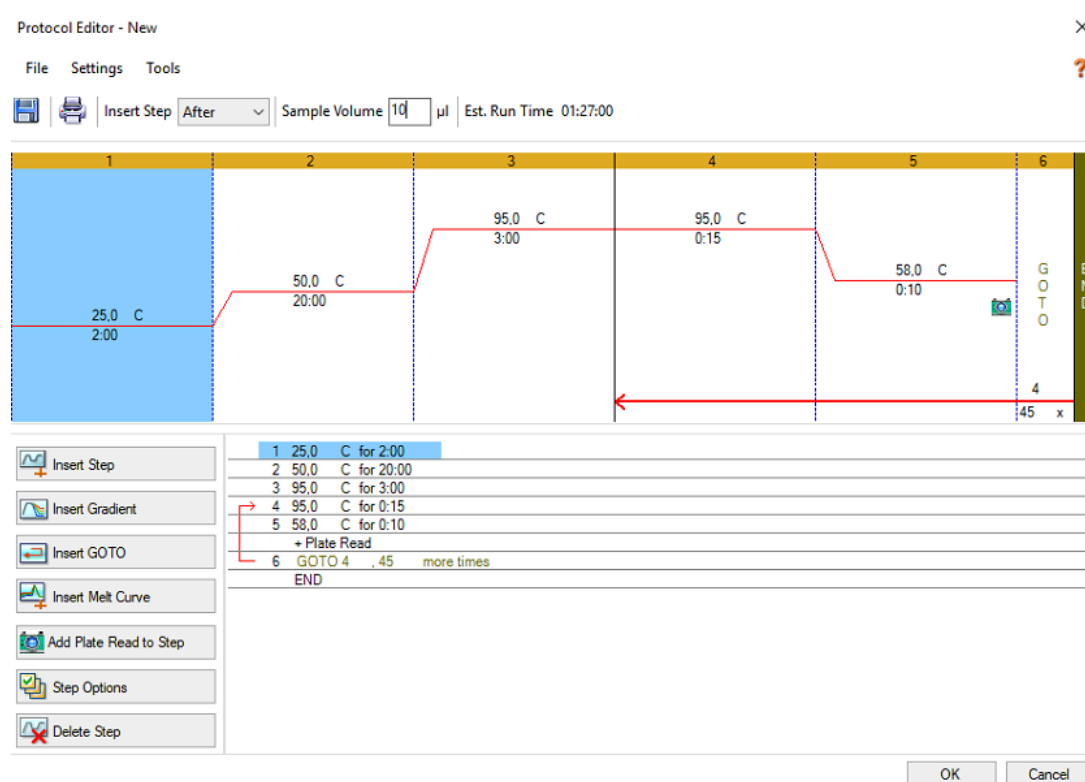

Figure SOP1. CFX RT-qPCR program.

## 4. Quality Controls

### 4.1. Experimental Controls

The experimental design incorporates comprehensive controls to monitor all critical steps of both the assay and data interpretation, including specimen quality and RNA extraction efficiency, performance of the reverse transcription and PCR reaction, as well as, pipetting reproducibility. In addition, we use a negative control to monitor contamination. Reproducibility is also warranted by targeting two regions of the COVID-19 *N-gene*.

We also include a negative sample or water as an RNA extraction control in each run.

### 4.2. Internal Sampling Control

Quality Controls:

- Negative controls: NTC in RT-qPCR (only water)
- Positive controls: Twist Synthetic SARS-CoV-2 RNA Control 1. Positive controls are added in each experiment at 4 different concentrations ( $10^5$ ,  $10^4$ ,  $10^3$  and  $10^2$ ). These positive standards monitor the sensitivity of the reaction and the reproducibility of the measurements, as well as, an evaluation of the PCR efficiency (R-correlation).
- RP target: *RNase P* (low levels of human mRNA) which serves as control for the RNA quality (degradation) in the sample and reverse-transcription efficiency.

### 4.3. Room Separation and Decontamination

It is absolutely necessary to separate the areas of sample processing, RNA extraction, and RT-qPCR. An amplification product should never be introduced in the area that is intended for extraction and sample material must not be introduced in the area for setting

up the amplification master mix. This is guaranteed since 1) these steps are carried out in different biosafety laminar flow hoods that are cleaned (made free of genetic material) after each process and 2) plates with PCR product stay sealed. Figure 6 shows how the laboratory is separated into four distinct sections. One room is used only for the set-up of the RT-PCR master mix (safety hood 1), the second room is for sample preparation and RNA extraction (safety hood 2), and the last room is for running the PCR reactions in the CFX thermocycler. In case of samples that are stored in non-lysing buffer conditions (NaCl, PBS) the samples are first prepared in safety hood 3 before they are further processed. Rooms 1, 2 and 3 are equipped with an MSC-Advantage™ Class II Biological Safety Cabinets; 1.8 m. Before starting the sample processing, the hoods and pipettes are wiped with DNA-off (Takara) and sterilized under UV light for 10 min. This procedure ensures the destruction of any potential contaminating RNA or DNA. Note that the fast, innate degradation of RNA reduces significantly the potential of contamination from this molecule. To prevent sample contamination 1) each room is used exclusively for the application or technique indicated and 2) the work flow is always unidirectional (indicated by the arrow). Additionally, equipment and consumables are not interchanged between the different laboratory rooms and spaces and accordingly, each room has its own pipettes, tip boxes, gloves and consumables.

## 5. Data Reporting

### 5.1. Data Interpretation

Results are interpreted according to the guidelines of the Centers for Disease Control and Prevention approved by the US federal Drug administration for emergency use (<https://www.fda.gov/media/134922/download>, accessed on 9 June 2021) as followed: where ‘+’ means that amplification with the corresponding primer set was detected ( $C_q < 45$ ) and ‘−’ means no amplification was detected.

**Table SOP5. Result interpretation according to CDC.**

| N1 | N2 | RP | Result                |
|----|----|----|-----------------------|
| +  | +  | +  | positive              |
| +  | +  | −  | positive              |
| +  | −  | +  | inconclusive          |
| −  | +  | +  | inconclusive          |
| +  | −  | −  | inconclusive          |
| −  | +  | −  | inconclusive          |
| −  | −  | +  | negative/not detected |
| −  | −  | −  | invalid               |

For samples with inconclusive or invalid results, the whole processing is repeated starting from the extraction (fresh RNA extraction and RT-qPCR). Only negative or positive samples will be uploaded into the KUK mainframe.

### 5.2. Transfer of Results

The complete procedure (scan of ID probes, experimental master mixes, and position of sample in the 96-well plate for RNA extraction and in the qPCR CFX run) is documented.

Every experiment is documented in a partially automated Excel documentation summary file based on a previously made template to ensure a reproducible analysis and to retrieve experimental procedure information. The file is organized with the following tabs:

**read me:** instructions for use

**samples:** Barcode of samples is read in with the barcode reader

**RNA extraction und qPCR:** Information and instructions for master mixes and reaction components (including lot numbers)

**96well und plates visualized:** Schematics of sample organization that is automatically created from “samples” showing the organization of samples in the 96-well plate for the RNA extraction or the 384-well plate in the qPCR. Pipetting of samples follows this schematic.

**384 well cfx export:** Data exported from the RT-qPCR run

**cfx data:** sorted data from the RT-qPCR run

**analysis:** Analysis of data and automatic assignation of results (positive, negative, inconclusive, invalid). Control reactions are checked and Cq values of the 3 different targets corresponding to the same samples are verified (“true” function).

**results:** list of the results forwarded to the KUK

The instructions described in the file must be followed. Barcodes of samples are scanned directly into this file. Master mix preparation for the RNA extraction and RT-qPCR are calculated automatically based onto the total samples per experiment and a user-set amount of excess reactions. A visual pipetting scheme for the 96-well and the 384-well plate is automatically created to help with the pipetting. The pipetting scheme is exported as a semi-colon separated .csv file and imported into the Bio-Rad CFX Manager 3.1 to avoid manual data handling. After the RT-qPCR run, the raw data of the run is exported from the Bio-Rad CFX Manager 3.1 and imported into the documentation file. Samples are sorted by sample number and target name (N1, N2 and RP) and manually copied into the analysis tab where a result is assigned to the sample automatically based on the guideline in *Data interpretation*. Instead of differentiating between “inconclusive” and “invalid” results, a new category called “repeat” is used. The tab “results” presents a summary of the results, which is used by the KUK to import this data into their system. LOT numbers, notes, deviations from the protocol and unexpected observations are also documented in this file.

### 5.3. Storage of Patient’s Sample and Data

Patient specimen of positive samples will be stored at  $-80^{\circ}\text{C}$ .

Extracted RNA of positively detected patient samples is transferred from 96-well elution plate to 1.6 mL low-binding tube and will be stored at  $-80^{\circ}\text{C}$ . Those samples are provided with a label containing the sample ID and date of extraction.

## 6. Warnings or Precautions

### 6.1. Contamination Prevention

- Lab coats must be worn throughout the whole process and different sets of lab coats are required for each laboratory room. To avoid contamination through the sleeves, disposable sleeves that are exchanged regularly are worn.
- Gloves must be worn during each step of the analysis and must be frequently changed, especially during RNA extraction.
- The working place must be decontaminated with an appropriate cleaning solution (e.g. DNA-off) and the hoods need to be sterilized with 10 min of UV light.
- Never touch the inside of a reaction tube cap.
- To avoid cross-contamination, open only one tube at a time.
- Appropriate micropipette filter tips with aerosol barrier must be used (free of DNase, RNase and human DNA).
- Pipette tips must be changed between liquid transfers (except for master mixes).



- Multichannel pipettes (12- or 24-well channel) are used to avoid confusion of samples or well-misplacement. The use of multichannel pipettes also reduces the number of pipetting steps.
- The samples are always deposited in the same area which is decontaminated after every use.
- Samples are only opened in the BSC hood to reduce the risk of contamination of the personnel.

#### 6.2. Working Safely (Biosafety Level II Conditions)

- To minimise the risk of infection from potentially infectious material, the virus-containing swab is already in inactivating lysis buffer. If not, it is inactivated under laminar air-flow conditions until sample lysis is completed.
- All biological samples are handled and disposed according to the directives for biological safety.
- Avoid direct contact with the biological samples. Aerosols are avoided by the laminar flow hood and samples are handled behind a safety glass.
- Always wear a lab coat and gloves while working with human samples.
- No eating, drinking, or smoking is allowed in the laboratory.
- Wash hands carefully after handling of samples and reagents.
- The personnel are tested on a regular basis to check for infection with the virus.

#### 6.3. General Precautions

- This set-up is for *in vitro* diagnostic use only and should only be used by trained personnel with qualifications in molecular biology.
- Upon arrival, check the kit components for damage. Do not use damaged kit components, as their use may lead to poor kit performance.
- Check the expiration dates of the reagents.
- Do not use expired reagents (e.g. RT-qPCR kit).
- Pipetting of small amounts of liquid in the microliter range is a challenge. Pipetting is monitored via labelled tips and multichannel. Revision of pipetting volume before each pipetting step. The use of electronic pipettes ensures the accurate and reproducible pipetting of volumes.
- Pipetting errors during preparation of the components like master mixes or during RNA extraction is limited with the use of multichannel pipettes and electronic pipettes
- PCR program on thermocycler is pre-programmed to avoid the wrong choice of PCR conditions (program template with input data of sample IDs).

#### 6.4. Contamination Containment

- Regular checks for contamination with NTC are performed in each experiment.
- In case of contamination, all open aliquots will be discarded and a new aliquot will be taken. This includes all the reagents for RNA extraction, as well for the RT-qPCR reaction.
- Decontamination is carried out by the treatment of the hoods with UV light, wiping the hood surfaces and the pipettes with DNA-off, exchanging tip boxes, lab coats and arm sleeves.
- Door handles and machine surfaces will also be wiped with DNA-off.
